# Supplementary material for: Validation of the Recovery Experience Questionnaire in a Lithuanian Healthcare Personnel
Source: MDPI journal article supplement (doi:10.3390/ijerph20032734), 2023-02-03
Supplement: s1 [file s1]

SUPPLEMENTARY MATERIAL

Table S1. Descriptive statistics and inter-correlations of the Recovery Experience Questionnaire items

| No | Items   | M (SD)      | 1     | 2     | 3     | 4     | 5     | 6     | 7     | 8     | 9     | 10    | 11    | 12    | 13    | 14    | 15    |
|----|---------|-------------|-------|-------|-------|-------|-------|-------|-------|-------|-------|-------|-------|-------|-------|-------|-------|
| 1  | Item 1  | 3.51 (1.02) | -     |       |       |       |       |       |       |       |       |       |       |       |       |       |       |
| 2  | Item 2  | 3.26 (1.09) | .28** | -     |       |       |       |       |       |       |       |       |       |       |       |       |       |
| 3  | Item 3  | 2.51 (1.06) | .20** | .22** | -     |       |       |       |       |       |       |       |       |       |       |       |       |
| 4  | Item 4  | 3.48 (0.94) | .63** | .24** | .30** | -     |       |       |       |       |       |       |       |       |       |       |       |
| 5  | Item 5  | 2.20 (0.97) | .16** | .15** | .66** | .21** | -     |       |       |       |       |       |       |       |       |       |       |
| 6  | Item 6  | 2.89 (0.98) | .45** | .28** | .43** | .44** | .40** | -     |       |       |       |       |       |       |       |       |       |
| 7  | Item 7  | 2.99 (1.01) | .19** | .47** | .24** | .17** | .17** | .27** | -     |       |       |       |       |       |       |       |       |
| 8  | Item 8  | 2.96 (1.04) | .10*  | .51** | .26** | .09*  | .18** | .13** | .60** | -     |       |       |       |       |       |       |       |
| 9  | Item 9  | 3.54 (0.95) | .64** | .29** | .26** | .70** | .21** | .46** | .27** | .15** | -     |       |       |       |       |       |       |
| 10 | Item 10 | 2.99 (0.99) | .26** | .18** | .55** | .31** | .52** | .55** | .17** | .08   | .36** | -     |       |       |       |       |       |
| 11 | Item 11 | 3.44 (0.90) | .47** | .33** | .35** | .46** | .26** | .53** | .35** | .15** | .52** | .45** | -     |       |       |       |       |
| 12 | Item 12 | 3.34 (0.94) | .41** | .26** | .28** | .39** | .23** | .53** | .27** | .12** | .44** | .42** | .76** | -     |       |       |       |
| 13 | Item 13 | 3.79 (0.78) | .34** | .28** | .22** | .44** | .22** | .36** | .23** | .11*  | .46** | .29** | .44** | .41** | -     |       |       |
| 14 | Item 14 | 3.49 (0.87) | .42** | .23** | .26** | .39** | .22** | .52** | .21** | .02   | .47** | .46** | .60** | .62** | .41** | -     |       |
| 15 | Item 15 | 3.43 (0.94) | .36** | .54** | .25** | .32** | .17** | .41** | .47** | .37** | .42** | .27** | .50** | .50** | .37** | .52** | -     |
| 16 | Item 16 | 3.05 (1.00) | .27** | .20** | .59** | .35** | .55** | .55** | .24** | .14** | .37** | .68** | .49** | .48** | .36** | .50** | .40** |
